# Supplementary material for: Sequence-regulated vinyl copolymers with acid and base monomer units via atom transfer radical addition and alternating radical copolymerization
Source: Royal Society of Chemistry journal article supplement (doi:10.1039/c6py00965d), 2016-01-01
Supplement: c6py00965d1.pdf [file c6py00965d1.pdf]

*Supporting Information*

**Sequence-regulated vinyl copolymers with acid and base monomer units via atom transfer radical addition and alternating radical copolymerization**

Takamasa Soejima,<sup>†</sup> Kotaro Satoh<sup>†,‡,\*</sup> and Masami Kamigaito<sup>†,\*</sup>

<sup>†</sup>*Department of Applied Chemistry, Graduate School of Engineering, Nagoya University,  
Nagoya 464-8603, Japan*

<sup>‡</sup>*Precursory Research for Embryonic Science and Technology, Japan Science and Technology  
Agency, 4-1-8 Honcho, Kawaguchi, Saitama 332-0012, Japan*

*e-mail: satoh@apchem.nagoya-u.ac.jp, kamigait@apchem.nagoya-u.ac.jp*

**Contents:**

|                       |    |
|-----------------------|----|
| <b>Fig. S1</b> .....  | S2 |
| <b>Fig. S2</b> .....  | S3 |
| <b>Fig. S3</b> .....  | S3 |
| <b>Fig. S4</b> .....  | S4 |
| <b>Fig. S5</b> .....  | S5 |
| <b>Table S1</b> ..... | S6 |

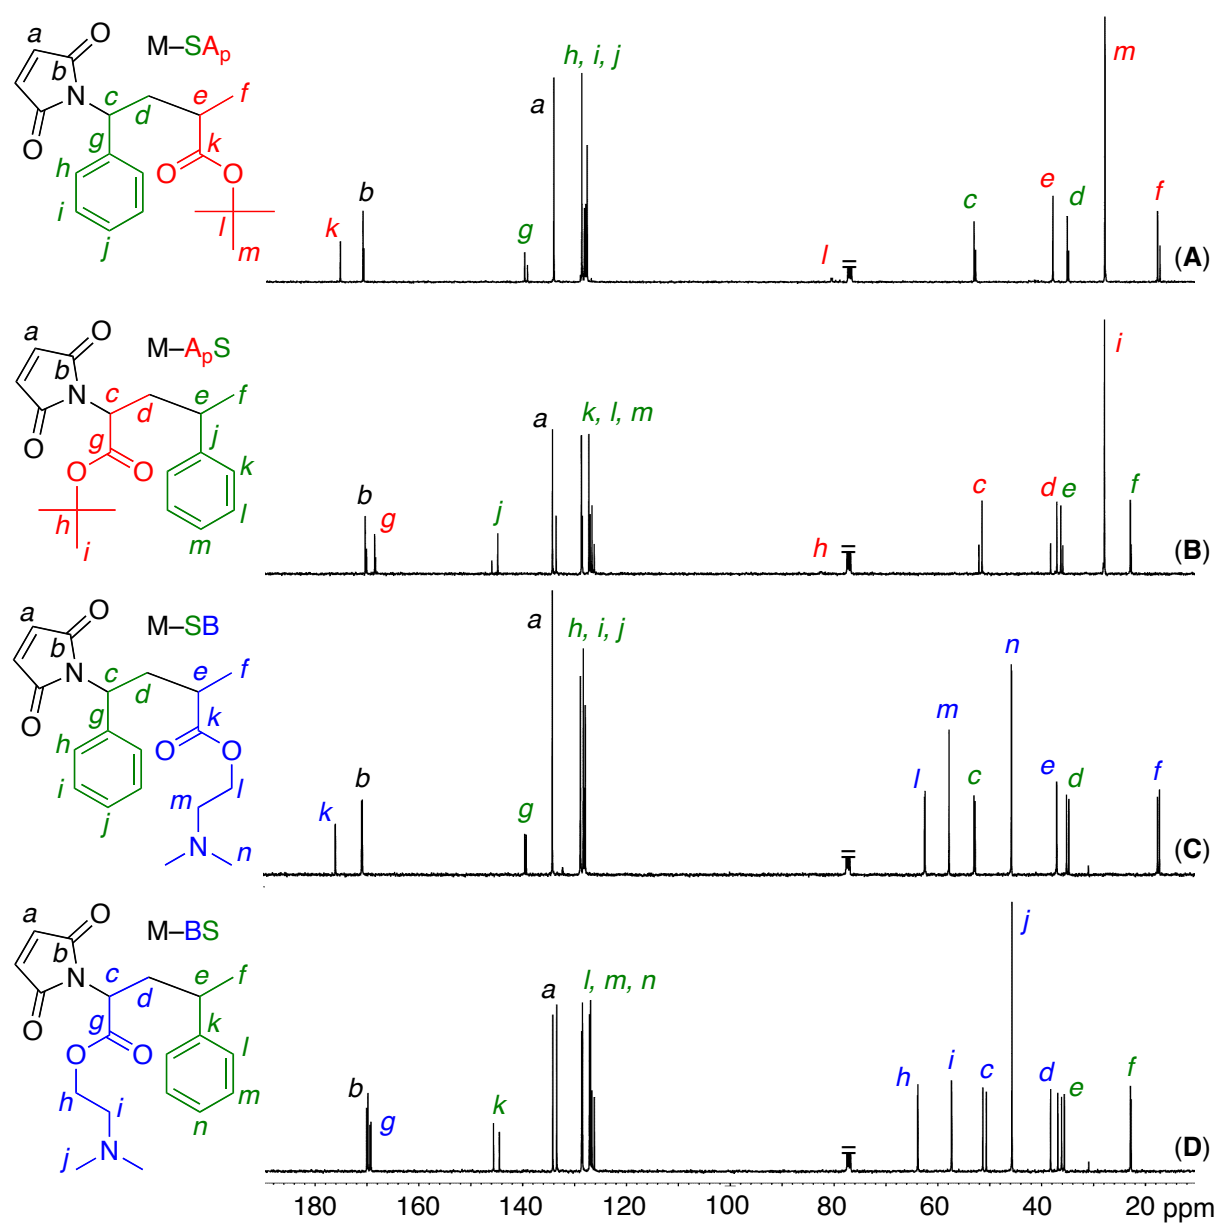

**Fig. S1.**  $^{13}\text{C}$  NMR spectra (CDCl<sub>3</sub>, r.t.) of a series of maleimide-ended sequence-regulated oligomers (M-SA<sub>p</sub> (A), M-A<sub>p</sub>S (B), M-SB (C), M-BS (D)).

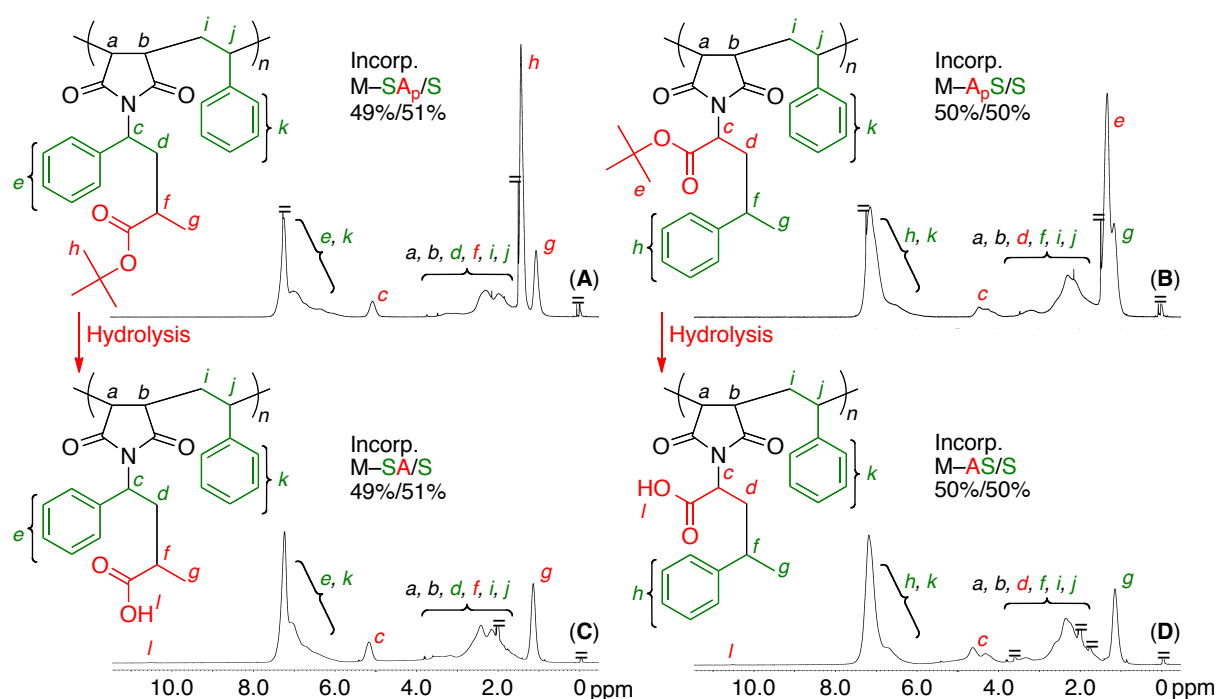

**Fig. S2.**  $^1\text{H}$  NMR spectra of a series of main- and side-chain sequence-regulated acid-functionalized vinyl copolymers ( $\text{poly}(\text{M}_1\text{-alt-S})$ ) obtained in alternating free radical copolymerization of maleimide-ended functional oligomonomers and styrene with AIBN in toluene at  $60^\circ\text{C}$  ( $[\text{M}_1]_0 = [\text{S}]_0 = 1.0\text{ M}$ ,  $[\text{AIBN}]_0 = 20\text{ mM}$ ) and after deprotections of *t*Bu ester.  $\text{M}_1$ : M- $\text{SA}_p$  (A), M- $\text{A}_p\text{S}$  (B), M-SA (A), M-AS (D).

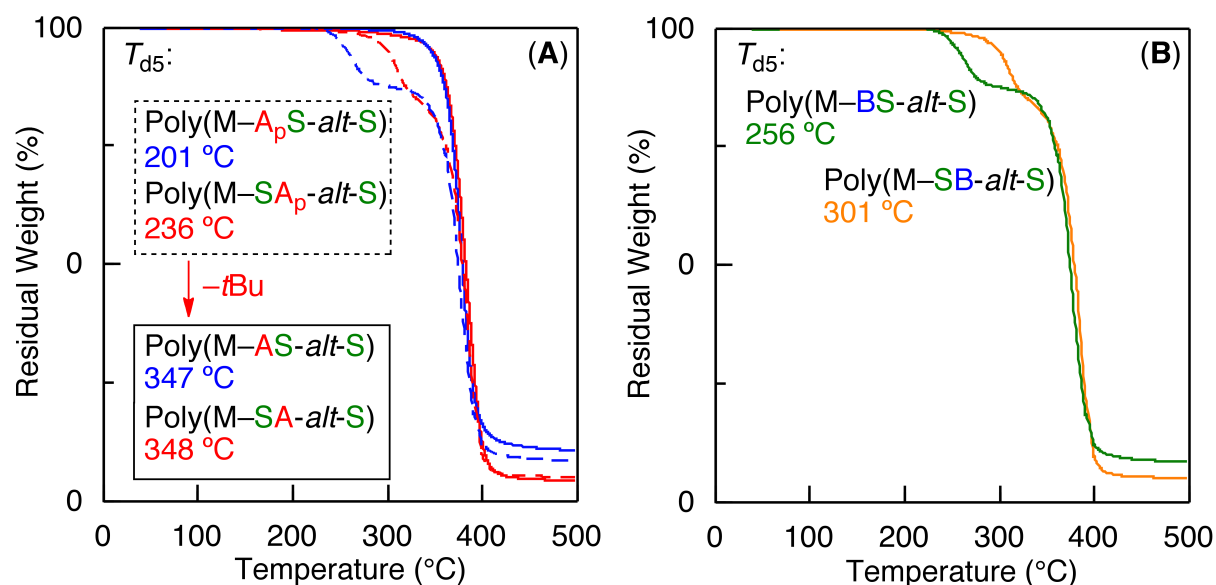

**Fig. S3.** TGA curves and  $T_{d5}$  values a series of main- and side-chain sequence-regulated functional vinyl copolymers ( $\text{poly}(\text{M}_1\text{-alt-S})$ ) obtained in alternating free radical copolymerization of sequence-regulated maleimide-ended oligomonomers and styrene. (A) dotted lines:  $\text{poly}(\text{M-}\text{SA}_p\text{-alt-S})$  and  $\text{poly}(\text{M-A}_p\text{S-alt-S})$ . solid lines:  $\text{poly}(\text{M-SA-alt-S})$  and  $\text{poly}(\text{M-AS-alt-S})$ . (B)  $\text{poly}(\text{M-SB-alt-S})$  and  $\text{poly}(\text{M-BS-alt-S})$ .

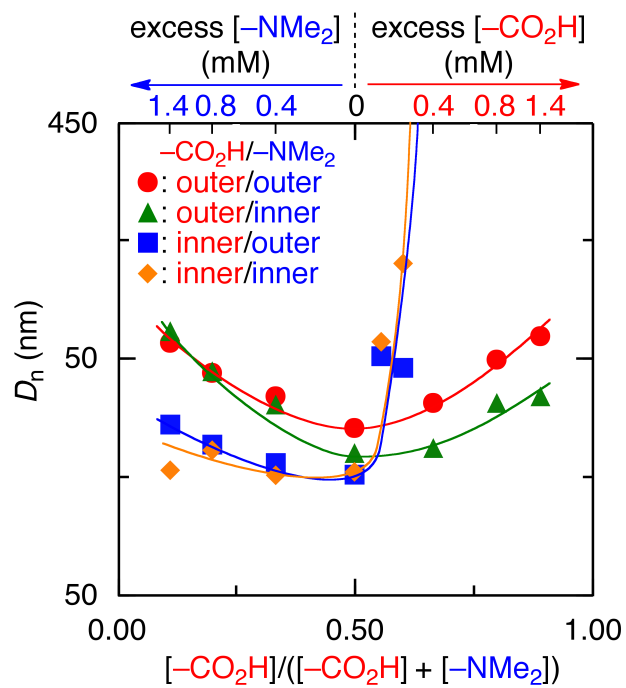

**Fig. S4.** DLS analysis of mixture of acid- and base-functionalized sequence-regulated vinyl copolymers at different ratios in  $\text{CHCl}_3$  at 20 °C.  $[-\text{CO}_2\text{H}] = [-\text{NMe}_2] = 0.20$  mM at  $[-\text{CO}_2\text{H}]/([-\text{CO}_2\text{H}] + [-\text{NMe}_2]) = 0.50$ .

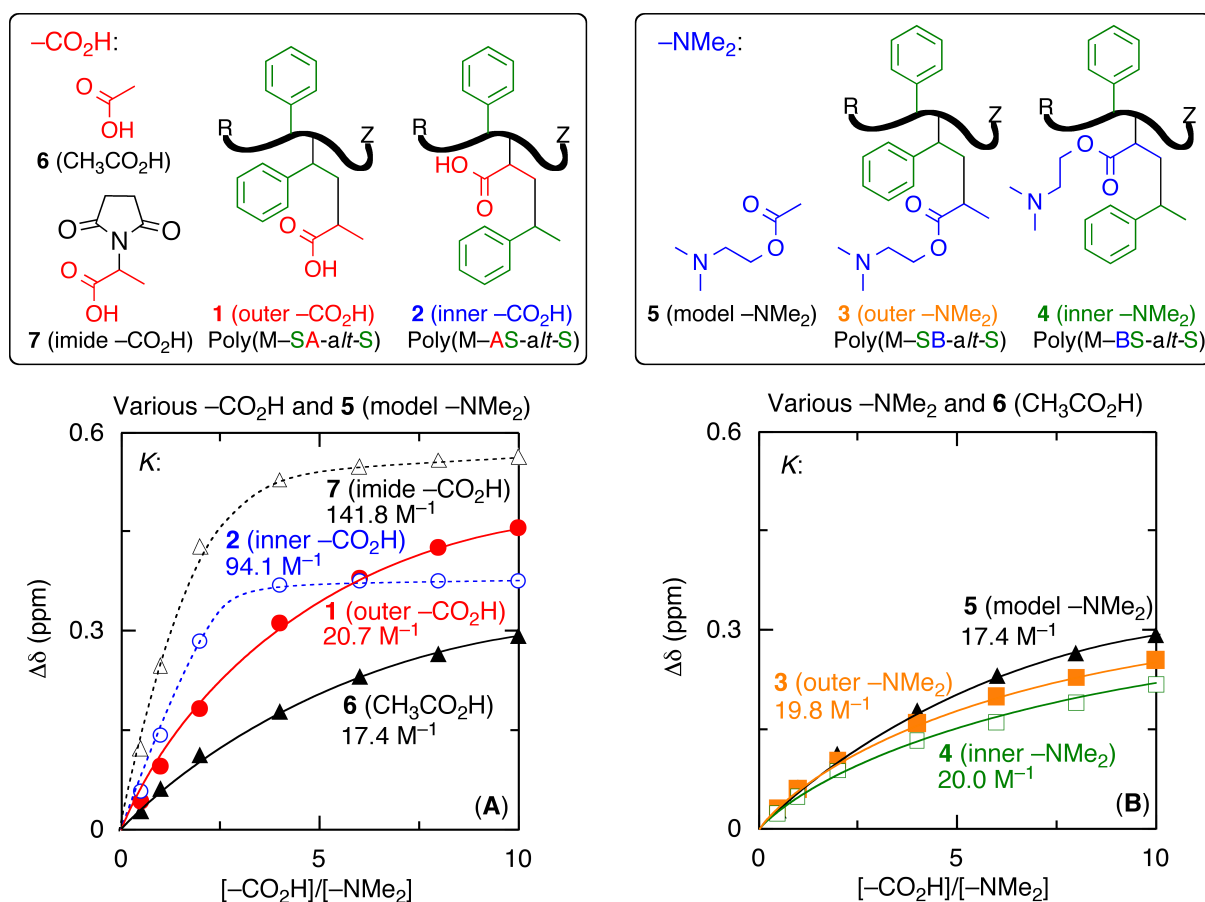

**Fig. S5.** NMR titration and equilibrium constants ( $K$ ) between sequence-regulated acid-functionalized oligomonomers and model amine (**5**) (A) or base-functionalized oligomonomers and  $\text{CH}_3\text{CO}_2\text{H}$  (**6**) (B) obtained by the changes in chemical shifts (ppm) of methyl protons of dimethylamino groups in  $\text{CDCl}_3$  at 20 °C.  $[-\text{NMe}_2] = 10 \text{ mM}$ .

**Table S1.** Alternating RAFT copolymerization of sequence-regulated functional oligomonomers ( $M_1$ ) and Styrene (S)

| Entry          | $M_1$              | $([M_1]_0 + [S]_0) / [CDB]_0$ | Time, h | Conv., % <sup>c</sup><br>$M_1/S$ | $M_n^d$ | $M_w/M_n^d$ | Incorp. % <sup>c</sup><br>$M_1/S$ |
|----------------|--------------------|-------------------------------|---------|----------------------------------|---------|-------------|-----------------------------------|
| 1 <sup>a</sup> | M-SA <sub>p</sub>  | 100                           | 24      | 95/96                            | 15900   | 1.16        | 49/51                             |
| 2 <sup>a</sup> | M-A <sub>p</sub> S | 100                           | 24      | 92/95                            | 16000   | 1.17        | 49/51                             |
| 3 <sup>b</sup> | M-SB               | 100                           | 24      | 96/94                            | 12100   | 1.34        | 50/50                             |
| 4 <sup>b</sup> | M-BS               | 100                           | 24      | 96/97                            | 11800   | 1.24        | 50/50                             |

Polymerization condition: <sup>a</sup> $[M_1]_0/[S]_0/[CDB]_0/[AIBN]_0 = 1000/1000/20/5.0$  mM in toluene at 60 °C. <sup>b</sup> $[M_1]_0/[S]_0/[CDB]_0/[V-70]_0 = 1000/1000/20/5.0$  mM in PhC(CF<sub>3</sub>)<sub>2</sub>OH at 20 °C.  
<sup>c</sup>Determined by <sup>1</sup>H NMR. <sup>d</sup>Determined by SEC.
